# Supplementary figures and images for: Proteomic landscape of colorectal cancer liver metastasis: molecular signatures and novel therapeutic targets
Source: PeerJ journal article supplement (doi:10.7717/peerj.20856), 2026-02-23

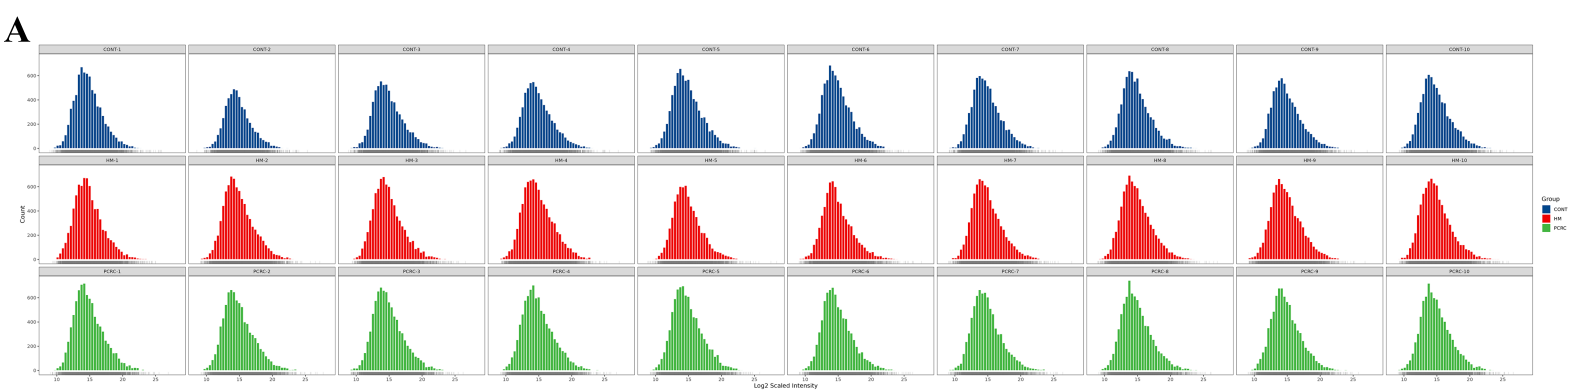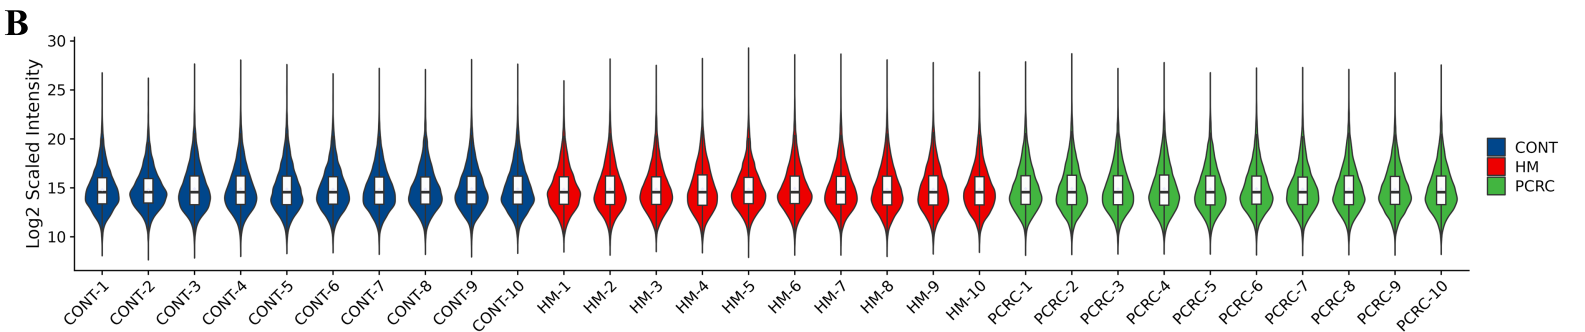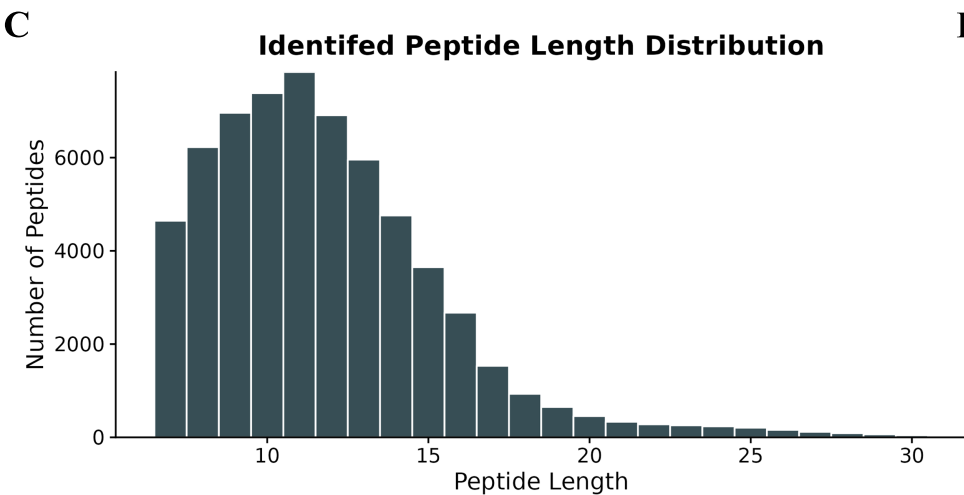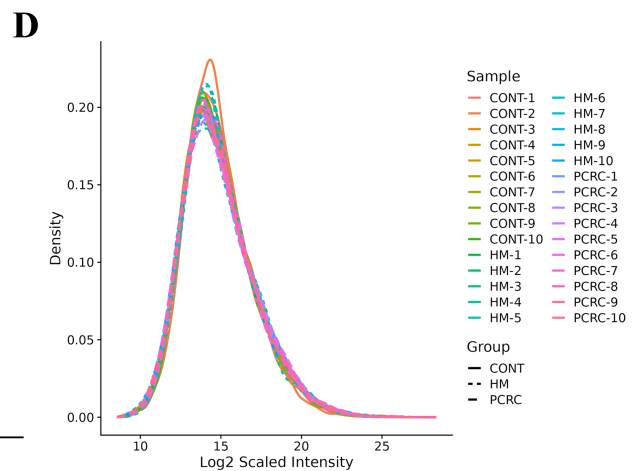

Supplement: supplementary_S1_staffRL.pdf [file supplementary_S1_staffRL.pdf]
